# Supplementary material for: Healing by Leaps and Gowns: A Novel Patient Gowning System to the Rescue
Source: PubMed Central journal article supplement — J Patient Exp. 2021 Jul 21;8:23743735211033152. doi: 10.1177/23743735211033152 (PMC8299883; doi:10.1177/23743735211033152), 2021-07-21
Supplement: sj-pdf-1-jpx-10.1177_23743735211033152.pdf [file sj-pdf-1-jpx-10.1177_23743735211033152.pdf]

Summary descriptives table

|                                                                                          | [ALL] N=225 | N   |
|------------------------------------------------------------------------------------------|-------------|-----|
| Gender:                                                                                  |             | 225 |
| Female                                                                                   | 181 (80.4%) |     |
| Male                                                                                     | 28 (12.4%)  |     |
| 'Missing'                                                                                | 16 (7.11%)  |     |
| Age:                                                                                     |             | 225 |
| 21-40                                                                                    | 60 (26.7%)  |     |
| 41-60                                                                                    | 69 (30.7%)  |     |
| 61-80                                                                                    | 66 (29.3%)  |     |
| 80+                                                                                      | 21 (9.33%)  |     |
| Younger than 20                                                                          | 6 (2.67%)   |     |
| 'Missing'                                                                                | 3 (1.33%)   |     |
| Which.garment.type.did.you.use?:                                                         |             | 225 |
| Jumpsuit                                                                                 | 154 (68.4%) |     |
| None- it was a Gown/Dress                                                                | 1 (0.44%)   |     |
| Top and Pants                                                                            | 19 (8.44%)  |     |
| Top only                                                                                 | 51 (22.7%)  |     |
| Did.you.like.the.option.to.modify.the.Jumpsuit.and.pants.<br>into.a.nightgown.or.skirt?: |             | 225 |
| No                                                                                       | 18 (8.00%)  |     |
| Not Applicable                                                                           | 11 (4.89%)  |     |
| Yes                                                                                      | 125 (55.6%) |     |
| 'Missing'                                                                                | 71 (31.6%)  |     |
| Were.you.able.to.move.about.easily.when.walking.and.w<br>hile.in.bed?:                   |             | 225 |
| Definitely No                                                                            | 4 (1.78%)   |     |
| Definitely Yes                                                                           | 89 (39.6%)  |     |
| Neutral/No Opinion                                                                       | 22 (9.78%)  |     |
| Received on discharge day                                                                | 1 (0.44%)   |     |
| Somewhat No                                                                              | 9 (4.00%)   |     |
| Somewhat Yes                                                                             | 99 (44.0%)  |     |
| 'Missing'                                                                                | 1 (0.44%)   |     |
| Was.this.gown.easy.to.put.on.and.remove?:                                                |             | 225 |
| Definitely No                                                                            | 6 (2.67%)   |     |

|                                                                                                                |             |     |
|----------------------------------------------------------------------------------------------------------------|-------------|-----|
| Definitely Yes                                                                                                 | 123 (54.7%) |     |
| Neutral/No Opinion                                                                                             | 17 (7.56%)  |     |
| Somewhat No                                                                                                    | 9 (4.00%)   |     |
| Somewhat Yes                                                                                                   | 68 (30.2%)  |     |
| Too Big, I'm 4 feet                                                                                            | 1 (0.44%)   |     |
| 'Missing'                                                                                                      | 1 (0.44%)   |     |
| Compared.to.a.traditional.hospital.gown,.did.the.gown.m<br>ake.you.more.comfortable.and.protected?:            |             | 225 |
| Definitely No                                                                                                  | 5 (2.22%)   |     |
| Definitely Yes                                                                                                 | 122 (54.2%) |     |
| Neutral/No Opinion                                                                                             | 23 (10.2%)  |     |
| Somewhat No                                                                                                    | 9 (4.00%)   |     |
| Somewhat Yes                                                                                                   | 64 (28.4%)  |     |
| 'Missing'                                                                                                      | 2 (0.89%)   |     |
| Do.you.prefer.the.new.hospital.garments.to.the.tradition<br>al.hospital.gown?:                                 |             | 225 |
| Definitely No                                                                                                  | 10 (4.44%)  |     |
| Definitely Yes                                                                                                 | 106 (47.1%) |     |
| Need different sizes                                                                                           | 1 (0.44%)   |     |
| Neutral/No Opinion                                                                                             | 22 (9.78%)  |     |
| Somewhat No                                                                                                    | 12 (5.33%)  |     |
| Somewhat Yes                                                                                                   | 74 (32.9%)  |     |
| When.considering.your.overall.hospital.experience,.how.<br>important.is.the.comfort.of.the.hospital.clothing?: |             | 225 |
| Not Important                                                                                                  | 9 (4.00%)   |     |
| Somewhat Important                                                                                             | 74 (32.9%)  |     |
| Very Important                                                                                                 | 140 (62.2%) |     |
| 'Missing'                                                                                                      | 2 (0.89%)   |     |
