# Supplementary material for: Healing by Leaps and Gowns: A Novel Patient Gowning System to the Rescue
Source: PubMed Central journal article supplement — J Patient Exp. 2021 Jul 21;8:23743735211033152. doi: 10.1177/23743735211033152 (PMC8299883; doi:10.1177/23743735211033152), 2021-07-21
Supplement: sj-pdf-2-jpx-10.1177_23743735211033152.pdf [file sj-pdf-2-jpx-10.1177_23743735211033152.pdf]

Summary descriptives table

|                                                                                      | [ALL] N=90 | N  |
|--------------------------------------------------------------------------------------|------------|----|
| Gender:                                                                              |            | 90 |
| Female                                                                               | 54 (60.0%) |    |
| Male                                                                                 | 30 (33.3%) |    |
| 'Missing'                                                                            | 6 (6.67%)  |    |
| Age:                                                                                 |            | 90 |
| 21-40                                                                                | 12 (13.3%) |    |
| 41-60                                                                                | 20 (22.2%) |    |
| 41-61                                                                                | 1 (1.11%)  |    |
| 61-80                                                                                | 36 (40.0%) |    |
| 61-81                                                                                | 1 (1.11%)  |    |
| 80+                                                                                  | 12 (13.3%) |    |
| 'Missing'                                                                            | 8 (8.89%)  |    |
| Which.garment.type.did.you.use?:                                                     |            | 90 |
| Gown                                                                                 | 2 (2.22%)  |    |
| Jumpsuit                                                                             | 39 (43.3%) |    |
| Top and Pants                                                                        | 22 (24.4%) |    |
| Top only                                                                             | 21 (23.3%) |    |
| 'Missing'                                                                            | 6 (6.67%)  |    |
| Did.you.like.the.option.to.modify.the.Jumpsuit.and.pants.into.a.nightgown.or.skirt?: |            | 90 |
| No                                                                                   | 9 (10.0%)  |    |
| Yes                                                                                  | 39 (43.3%) |    |
| 'Missing'                                                                            | 42 (46.7%) |    |
| Were.you.able.to.move.about.easily.when.walking.and.while.in.bed?:                   |            | 90 |
| Definitely No                                                                        | 4 (4.44%)  |    |
| Definitely Yes                                                                       | 25 (27.8%) |    |
| Neutral/No Opinion                                                                   | 8 (8.89%)  |    |
| Somewhat No                                                                          | 3 (3.33%)  |    |
| Somewhat Yes                                                                         | 50 (55.6%) |    |
| Was.this.gown.easy.to.put.on.and.remove?:                                            |            | 90 |
| Definitely No                                                                        | 2 (2.22%)  |    |
| Definitely Yes                                                                       | 34 (37.8%) |    |

|                                                                                                            |            |    |
|------------------------------------------------------------------------------------------------------------|------------|----|
| Neutral/No Opinion                                                                                         | 8 (8.89%)  |    |
| Somewhat No                                                                                                | 3 (3.33%)  |    |
| Somewhat Yes                                                                                               | 43 (47.8%) |    |
| Compared.to.a.traditional.hospital.gown,.did.the.gown.make.you.more.comfortable.and.protected?:            |            | 90 |
| Definitely No                                                                                              | 2 (2.22%)  |    |
| Definitely Yes                                                                                             | 39 (43.3%) |    |
| Neutral/No Opinion                                                                                         | 4 (4.44%)  |    |
| Somewhat No                                                                                                | 4 (4.44%)  |    |
| Somewhat Yes                                                                                               | 39 (43.3%) |    |
| 'Missing'                                                                                                  | 2 (2.22%)  |    |
| Do.you.prefer.the.new.hospital.garments.to.the.traditional.hospital.gown?:                                 |            | 90 |
| Definitely No                                                                                              | 2 (2.22%)  |    |
| Definitely Yes                                                                                             | 32 (35.6%) |    |
| Neutral/No Opinion                                                                                         | 5 (5.56%)  |    |
| Somewhat No                                                                                                | 4 (4.44%)  |    |
| Somewhat Yes                                                                                               | 44 (48.9%) |    |
| 'Missing'                                                                                                  | 3 (3.33%)  |    |
| When.considering.your.overall.hospital.experience,.how.important.is.the.comfort.of.the.hospital.clothing?: |            | 90 |
| Not Important                                                                                              | 1 (1.11%)  |    |
| Somewhat Important                                                                                         | 15 (16.7%) |    |
| Very Important                                                                                             | 74 (82.2%) |    |
