# Supplementary material for: Healing by Leaps and Gowns: A Novel Patient Gowning System to the Rescue
Source: PubMed Central journal article supplement — J Patient Exp. 2021 Jul 21;8:23743735211033152. doi: 10.1177/23743735211033152 (PMC8299883; doi:10.1177/23743735211033152), 2021-07-21
Supplement: sj-pdf-3-jpx-10.1177_23743735211033152.pdf [file sj-pdf-3-jpx-10.1177_23743735211033152.pdf]

Summary descriptives table

|                                                                                                                                                                  | [ALL] N=150 | N   |
|------------------------------------------------------------------------------------------------------------------------------------------------------------------|-------------|-----|
| What.is.your.role.within.Northwell?:                                                                                                                             |             | 150 |
| CNA                                                                                                                                                              | 15 (10.0%)  |     |
| MOA                                                                                                                                                              | 2 (1.33%)   |     |
| OT                                                                                                                                                               | 1 (0.67%)   |     |
| Other                                                                                                                                                            | 27 (18.0%)  |     |
| PT                                                                                                                                                               | 1 (0.67%)   |     |
| RN                                                                                                                                                               | 104 (69.3%) |     |
| Which.type.of.PALS.gown.did.you.evaluate?:                                                                                                                       |             | 150 |
| All Three                                                                                                                                                        | 21 (14.0%)  |     |
| Jumpsuit                                                                                                                                                         | 78 (52.0%)  |     |
| Patient Top                                                                                                                                                      | 5 (3.33%)   |     |
| Top                                                                                                                                                              | 15 (10.0%)  |     |
| Top & Jumpsuit                                                                                                                                                   | 4 (2.67%)   |     |
| Top & Pants                                                                                                                                                      | 26 (17.3%)  |     |
| 'Missing'                                                                                                                                                        | 1 (0.67%)   |     |
| TOP-<br>Ease.of.Assisting.patient.with.donning.and.doffing.(removal<br>)?:                                                                                       |             | 150 |
| Normal/Typical                                                                                                                                                   | 11 (7.33%)  |     |
| Somewhat Difficult                                                                                                                                               | 9 (6.00%)   |     |
| Somewhat Easy                                                                                                                                                    | 43 (28.7%)  |     |
| Very Difficult                                                                                                                                                   | 1 (0.67%)   |     |
| Very Easy                                                                                                                                                        | 21 (14.0%)  |     |
| 'Missing'                                                                                                                                                        | 65 (43.3%)  |     |
| TOP-<br>Ease.of.examination.(physical.exam,.breastfeeding.assistan<br>ce,.IV,.Venopuncture).when.working.with.the.back.snaps,.fr<br>ont.snaps,.and.the.sleeves.: |             | 150 |
| Normal/Typical                                                                                                                                                   | 10 (6.67%)  |     |
| Somewhat Difficult                                                                                                                                               | 4 (2.67%)   |     |
| Somewhat Easy                                                                                                                                                    | 43 (28.7%)  |     |
| Very Difficult                                                                                                                                                   | 1 (0.67%)   |     |
| Very Easy                                                                                                                                                        | 23 (15.3%)  |     |
| 'Missing'                                                                                                                                                        | 69 (46.0%)  |     |

|                                                                                                         |            |     |
|---------------------------------------------------------------------------------------------------------|------------|-----|
| TOP-<br>Rate.the.new.top.(ease.of.interaction).in.comparison.to.the.<br>current.standard.hospital.gown: |            | 150 |
| Normal/Typical                                                                                          | 15 (10.0%) |     |
| Somewhat Difficult                                                                                      | 5 (3.33%)  |     |
| Somewhat Easy                                                                                           | 41 (27.3%) |     |
| Very Easy                                                                                               | 22 (14.7%) |     |
| 'Missing'                                                                                               | 67 (44.7%) |     |
| PANTS-<br>Ease.of.Assisting.patient.with.donning.and.doffing.(removal<br>)?:                            |            | 150 |
| Normal/Typical                                                                                          | 7 (4.67%)  |     |
| Somewhat Difficult                                                                                      | 6 (4.00%)  |     |
| Somewhat Easy                                                                                           | 26 (17.3%) |     |
| Very Easy                                                                                               | 23 (15.3%) |     |
| 'Missing'                                                                                               | 88 (58.7%) |     |
| PANTS-<br>Are.the.crotch.snaps.beneficial.for.both.ease.of.examination<br>.and.patient.bathroom.use?:   |            | 150 |
| No Difference                                                                                           | 9 (6.00%)  |     |
| Not Beneficial                                                                                          | 12 (8.00%) |     |
| Somewhat Beneficial                                                                                     | 22 (14.7%) |     |
| Somewhat Unbeneficial                                                                                   | 3 (2.00%)  |     |
| Very Beneficial                                                                                         | 9 (6.00%)  |     |
| 'Missing'                                                                                               | 95 (63.3%) |     |
| PANTS-<br>Are.the.crotch.snaps.beneficial.for.transition.from.pants.to.<br>skirt.and.back.to.pants?:    |            | 150 |
| No Difference                                                                                           | 7 (4.67%)  |     |
| Not Beneficial                                                                                          | 11 (7.33%) |     |
| Somewhat Beneficial                                                                                     | 22 (14.7%) |     |
| Somewhat Unbeneficial                                                                                   | 2 (1.33%)  |     |
| Very Beneficial                                                                                         | 9 (6.00%)  |     |
| 'Missing'                                                                                               | 99 (66.0%) |     |
| JUMPSUIT-<br>Ease.of.Assisting.patient.with.donning.and.doffing.(removal<br>)?:                         |            | 150 |

|                                                                                                                                                                       |            |     |
|-----------------------------------------------------------------------------------------------------------------------------------------------------------------------|------------|-----|
| Normal/Typical                                                                                                                                                        | 15 (10.0%) |     |
| Somewhat Difficult                                                                                                                                                    | 11 (7.33%) |     |
| Somewhat Easy                                                                                                                                                         | 48 (32.0%) |     |
| Very Easy                                                                                                                                                             | 31 (20.7%) |     |
| 'Missing'                                                                                                                                                             | 45 (30.0%) |     |
| JUMPSUIT-<br>Ease.of.examination.(physical.exam,.breastfeeding.assistan<br>ce,.IV,.Venopuncture).when.working.with.the.back.snaps,.fr<br>ont.snaps,.and.the.sleeves.: |            | 150 |
| Normal/Typical                                                                                                                                                        | 13 (8.67%) |     |
| Somewhat Difficult                                                                                                                                                    | 6 (4.00%)  |     |
| Somewhat Easy                                                                                                                                                         | 57 (38.0%) |     |
| Very Easy                                                                                                                                                             | 28 (18.7%) |     |
| 'Missing'                                                                                                                                                             | 46 (30.7%) |     |
| JUMPSUIT-<br>Are.the.crotch.snaps.beneficial.for.both.ease.of.examination<br>.and.patient.bathroom.use?:                                                              |            | 150 |
| No Difference                                                                                                                                                         | 7 (4.67%)  |     |
| Not Beneficial                                                                                                                                                        | 31 (20.7%) |     |
| Somewhat Beneficial                                                                                                                                                   | 44 (29.3%) |     |
| Very Beneficial                                                                                                                                                       | 12 (8.00%) |     |
| 'Missing'                                                                                                                                                             | 56 (37.3%) |     |
| JUMPSUIT-<br>Are.the.crotch.snaps.beneficial.for.transition.from.pants.to.<br>skirt.and.back.to.pants?:                                                               |            | 150 |
| No Difference                                                                                                                                                         | 15 (10.0%) |     |
| Not Beneficial                                                                                                                                                        | 20 (13.3%) |     |
| Somewhat Beneficial                                                                                                                                                   | 33 (22.0%) |     |
| Very Beneficial                                                                                                                                                       | 19 (12.7%) |     |
| 'Missing'                                                                                                                                                             | 63 (42.0%) |     |
| OVERALL-What.did.you.think.of.the.design?:                                                                                                                            |            | 150 |
| Neutral/No Opinion                                                                                                                                                    | 13 (8.67%) |     |
| Somewhat Dislike                                                                                                                                                      | 8 (5.33%)  |     |
| Somewhat Like                                                                                                                                                         | 56 (37.3%) |     |
| Very Much Dislike                                                                                                                                                     | 7 (4.67%)  |     |
| Very Much Like                                                                                                                                                        | 41 (27.3%) |     |
| 'Missing'                                                                                                                                                             | 25 (16.7%) |     |

|                                                                                                              |            |     |
|--------------------------------------------------------------------------------------------------------------|------------|-----|
| OVERALL-<br>If.you.were.an.inpatient,.would.you.like.the.wear.it.over.the<br>.conventional.gown?:            |            | 150 |
| Definitely No                                                                                                | 9 (6.00%)  |     |
| Definitely Yes                                                                                               | 38 (25.3%) |     |
| Neutral/No Opinion                                                                                           | 6 (4.00%)  |     |
| Somewhat No                                                                                                  | 10 (6.67%) |     |
| Somewhat Yes                                                                                                 | 62 (41.3%) |     |
| 'Missing'                                                                                                    | 25 (16.7%) |     |
| OVERALL-<br>As.a.caregiver,.did.this.gown.make.caring.for.the.patient.ea<br>sy?:                             |            | 150 |
| Definitely No                                                                                                | 5 (3.33%)  |     |
| Definitely Yes                                                                                               | 40 (26.7%) |     |
| Neutral/No Opinion                                                                                           | 13 (8.67%) |     |
| Somewhat No                                                                                                  | 6 (4.00%)  |     |
| Somewhat Yes                                                                                                 | 61 (40.7%) |     |
| 'Missing'                                                                                                    | 25 (16.7%) |     |
| OVERALL-<br>Did.the.patient.seem.happy./.satisfied.with.this.gown?:                                          |            | 150 |
| Definitely No                                                                                                | 2 (1.33%)  |     |
| Definitely Yes                                                                                               | 47 (31.3%) |     |
| Neutral/No Opinion                                                                                           | 10 (6.67%) |     |
| Somewhat No                                                                                                  | 8 (5.33%)  |     |
| Somewhat Yes                                                                                                 | 58 (38.7%) |     |
| 'Missing'                                                                                                    | 25 (16.7%) |     |
| OVERALL-<br>Did.you.notice.any.improvements,.in.regard.to.the.patient.e<br>xperience,.because.of.this.gown?: |            | 150 |
| Definitely No                                                                                                | 7 (4.67%)  |     |
| Definitely Yes                                                                                               | 40 (26.7%) |     |
| Neutral/No Opinion                                                                                           | 17 (11.3%) |     |
| Somewhat No                                                                                                  | 6 (4.00%)  |     |
| Somewhat Yes                                                                                                 | 55 (36.7%) |     |
| 'Missing'                                                                                                    | 25 (16.7%) |     |
