# Supplementary material for: Healing by Leaps and Gowns: A Novel Patient Gowning System to the Rescue
Source: PubMed Central journal article supplement — J Patient Exp. 2021 Jul 21;8:23743735211033152. doi: 10.1177/23743735211033152 (PMC8299883; doi:10.1177/23743735211033152), 2021-07-21
Supplement: sj-pdf-4-jpx-10.1177_23743735211033152.pdf [file sj-pdf-4-jpx-10.1177_23743735211033152.pdf]

Summary descriptives table

|                                                                                                                                                                  | [ALL] N=99 | N  |
|------------------------------------------------------------------------------------------------------------------------------------------------------------------|------------|----|
| What.is.your.role.within.Northwell?:                                                                                                                             |            | 99 |
| CNA                                                                                                                                                              | 30 (30.3%) |    |
| MA                                                                                                                                                               | 1 (1.01%)  |    |
| MD                                                                                                                                                               | 1 (1.01%)  |    |
| MOA                                                                                                                                                              | 2 (2.02%)  |    |
| Other                                                                                                                                                            | 10 (10.1%) |    |
| PCA                                                                                                                                                              | 1 (1.01%)  |    |
| PT                                                                                                                                                               | 1 (1.01%)  |    |
| RN                                                                                                                                                               | 51 (51.5%) |    |
| 'Missing'                                                                                                                                                        | 2 (2.02%)  |    |
| Which.type.of.PALS.gown.did.you.evaluate?:                                                                                                                       |            | 99 |
| All Three                                                                                                                                                        | 23 (23.2%) |    |
| Gown                                                                                                                                                             | 2 (2.02%)  |    |
| Jumpsuit                                                                                                                                                         | 37 (37.4%) |    |
| Pants                                                                                                                                                            | 2 (2.02%)  |    |
| Top                                                                                                                                                              | 16 (16.2%) |    |
| Top & Jumpsuit                                                                                                                                                   | 3 (3.03%)  |    |
| Top & Pants                                                                                                                                                      | 15 (15.2%) |    |
| 'Missing'                                                                                                                                                        | 1 (1.01%)  |    |
| TOP-<br>Ease.of.Assisting.patient.with.donning.and.doffing.(removal)?:                                                                                           |            | 99 |
| Normal/Typical                                                                                                                                                   | 11 (11.1%) |    |
| Somewhat Difficult                                                                                                                                               | 4 (4.04%)  |    |
| Somewhat Easy                                                                                                                                                    | 22 (22.2%) |    |
| Very Difficult                                                                                                                                                   | 2 (2.02%)  |    |
| Very Easy                                                                                                                                                        | 21 (21.2%) |    |
| 'Missing'                                                                                                                                                        | 39 (39.4%) |    |
| TOP-<br>Ease.of.examination.(physical.exam,.breastfeeding.assistance,.IV,.V<br>enopuncture).when.working.with.the.back.snaps,.front.snaps,.and.<br>the.sleeves.: |            | 99 |
| Normal/Typical                                                                                                                                                   | 15 (15.2%) |    |
| Somewhat Difficult                                                                                                                                               | 2 (2.02%)  |    |
| Somewhat Easy                                                                                                                                                    | 16 (16.2%) |    |

|                                                                                                         |            |    |
|---------------------------------------------------------------------------------------------------------|------------|----|
| Very Difficult                                                                                          | 1 (1.01%)  |    |
| Very Easy                                                                                               | 24 (24.2%) |    |
| 'Missing'                                                                                               | 41 (41.4%) |    |
| TOP-<br>Rate.the.new.top.(ease.of.interaction).in.comparison.to.the.current<br>.standard.hospital.gown: |            | 99 |
|                                                                                                         | 1 (1.01%)  |    |
| Normal/Typical                                                                                          | 15 (15.2%) |    |
| Somewhat Difficult                                                                                      | 3 (3.03%)  |    |
| Somewhat Easy                                                                                           | 14 (14.1%) |    |
| Very Difficult                                                                                          | 1 (1.01%)  |    |
| Very Easy                                                                                               | 24 (24.2%) |    |
| 'Missing'                                                                                               | 41 (41.4%) |    |
| PANTS-<br>Ease.of.Assisting.patient.with.donning.and.doffing.(removal)?:                                |            | 99 |
| Normal/Typical                                                                                          | 12 (12.1%) |    |
| Somewhat Difficult                                                                                      | 3 (3.03%)  |    |
| Somewhat Easy                                                                                           | 12 (12.1%) |    |
| Very Difficult                                                                                          | 2 (2.02%)  |    |
| Very Easy                                                                                               | 13 (13.1%) |    |
| 'Missing'                                                                                               | 57 (57.6%) |    |
| PANTS-<br>Are.the.crotch.snaps.beneficial.for.both.ease.of.examination.and.pa<br>tient.bathroom.use?:   |            | 99 |
| No Difference                                                                                           | 11 (11.1%) |    |
| Not Beneficial                                                                                          | 7 (7.07%)  |    |
| Somewhat Beneficial                                                                                     | 8 (8.08%)  |    |
| Very Beneficial                                                                                         | 7 (7.07%)  |    |
| 'Missing'                                                                                               | 66 (66.7%) |    |
| PANTS-<br>Are.the.crotch.snaps.beneficial.for.transition.from.pants.to.skirt.an<br>d.back.to.pants?:    |            | 99 |
| No Difference                                                                                           | 8 (8.08%)  |    |
| Not Beneficial                                                                                          | 5 (5.05%)  |    |
| Somewhat Beneficial                                                                                     | 10 (10.1%) |    |
| Very Beneficial                                                                                         | 7 (7.07%)  |    |
| 'Missing'                                                                                               | 69 (69.7%) |    |

|                                                                                                                                                                       |            |    |
|-----------------------------------------------------------------------------------------------------------------------------------------------------------------------|------------|----|
| JUMPSUIT-<br>Ease.of.Assisting.patient.with.donning.and.doffing.(removal)?:                                                                                           |            | 99 |
| Normal/Typical                                                                                                                                                        | 12 (12.1%) |    |
| Somewhat Difficult                                                                                                                                                    | 7 (7.07%)  |    |
| Somewhat Easy                                                                                                                                                         | 19 (19.2%) |    |
| Very Difficult                                                                                                                                                        | 1 (1.01%)  |    |
| Very Easy                                                                                                                                                             | 25 (25.3%) |    |
| 'Missing'                                                                                                                                                             | 35 (35.4%) |    |
| JUMPSUIT-<br>Ease.of.examination.(physical.exam.,breastfeeding.assistance,.IV,.V<br>enopuncture).when.working.with.the.back.snaps,.front.snaps,.and.<br>the.sleeves.: |            | 99 |
| Normal/Typical                                                                                                                                                        | 13 (13.1%) |    |
| Somewhat Difficult                                                                                                                                                    | 2 (2.02%)  |    |
| Somewhat Easy                                                                                                                                                         | 24 (24.2%) |    |
| Very Difficult                                                                                                                                                        | 1 (1.01%)  |    |
| Very Easy                                                                                                                                                             | 24 (24.2%) |    |
| 'Missing'                                                                                                                                                             | 35 (35.4%) |    |
| JUMPSUIT-<br>Are.the.crotch.snaps.beneficial.for.both.ease.of.examination.and.pa<br>tient.bathroom.use?:                                                              |            | 99 |
| No Difference                                                                                                                                                         | 13 (13.1%) |    |
| Not Beneficial                                                                                                                                                        | 2 (2.02%)  |    |
| Somewhat Beneficial                                                                                                                                                   | 22 (22.2%) |    |
| Very Beneficial                                                                                                                                                       | 26 (26.3%) |    |
| 'Missing'                                                                                                                                                             | 36 (36.4%) |    |
| JUMPSUIT-<br>Are.the.crotch.snaps.beneficial.for.transition.from.pants.to.skirt.an<br>d.back.to.pants?:                                                               |            | 99 |
| No Difference                                                                                                                                                         | 10 (10.1%) |    |
| Not Beneficial                                                                                                                                                        | 3 (3.03%)  |    |
| Somewhat Beneficial                                                                                                                                                   | 23 (23.2%) |    |
| Very Beneficial                                                                                                                                                       | 27 (27.3%) |    |
| 'Missing'                                                                                                                                                             | 36 (36.4%) |    |
| OVERALL-What.did.you.think.of.the.design?:                                                                                                                            |            | 99 |
|                                                                                                                                                                       | 1 (1.01%)  |    |
| Neutral/No Opinion                                                                                                                                                    | 12 (12.1%) |    |

|                                                                                                              |            |    |
|--------------------------------------------------------------------------------------------------------------|------------|----|
| Somewhat Dislike                                                                                             | 7 (7.07%)  |    |
| Somewhat Like                                                                                                | 27 (27.3%) |    |
| Very Much Dislike                                                                                            | 6 (6.06%)  |    |
| Very Much Like                                                                                               | 27 (27.3%) |    |
| 'Missing'                                                                                                    | 19 (19.2%) |    |
| OVERALL-<br>If.you.were.an.inpatient,.would.you.like.the.wear.it.over.the.conve<br>ntional.gown?:            |            | 99 |
| Definitely No                                                                                                | 5 (5.05%)  |    |
| Definitely Yes                                                                                               | 32 (32.3%) |    |
| Neutral/No Opinion                                                                                           | 8 (8.08%)  |    |
| Somewhat No                                                                                                  | 8 (8.08%)  |    |
| Somewhat Yes                                                                                                 | 28 (28.3%) |    |
| 'Missing'                                                                                                    | 18 (18.2%) |    |
| OVERALL-<br>As.a.caregiver,.did.this.gown.make.caring.for.the.patient.easy?:                                 |            | 99 |
| Definitely No                                                                                                | 1 (1.01%)  |    |
| Definitely Yes                                                                                               | 31 (31.3%) |    |
| Neutral/No Opinion                                                                                           | 15 (15.2%) |    |
| Somewhat No                                                                                                  | 2 (2.02%)  |    |
| Somewhat Yes                                                                                                 | 32 (32.3%) |    |
| 'Missing'                                                                                                    | 18 (18.2%) |    |
| OVERALL-Did.the.patient.seem.happy./.satisfied.with.this.gown?:                                              |            | 99 |
| Definitely No                                                                                                | 3 (3.03%)  |    |
| Definitely Yes                                                                                               | 37 (37.4%) |    |
| Neutral/No Opinion                                                                                           | 16 (16.2%) |    |
| Somewhat No                                                                                                  | 5 (5.05%)  |    |
| Somewhat Yes                                                                                                 | 20 (20.2%) |    |
| 'Missing'                                                                                                    | 18 (18.2%) |    |
| OVERALL-<br>Did.you.notice.any.improvements,.in.regard.to.the.patient.experie<br>nce,.because.of.this.gown?: |            | 99 |
| Definitely No                                                                                                | 4 (4.04%)  |    |
| Definitely Yes                                                                                               | 30 (30.3%) |    |
| Neutral/No Opinion                                                                                           | 22 (22.2%) |    |
| Somewhat No                                                                                                  | 4 (4.04%)  |    |

|              |            |  |
|--------------|------------|--|
| Somewhat Yes | 20 (20.2%) |  |
| 'Missing'    | 19 (19.2%) |  |
